# Supplementary material for: Cell-permeable GPNA with appropriate backbone stereochemistry and spacing binds sequence-specifically to RNA
Source: Royal Society of Chemistry journal article supplement (doi:10.1039/b412522c), 2004-12-02
Supplement: b412522c.pdf [file b412522c.pdf]

Supporting Information for:

ChemComm  
www.rsc.org/chemcomm

## Cell-Permeable GPNA Containing Appropriate Backbone Stereochemistry and Spacing Binds Sequence-Specifically to RNA

Anca Dragulescu-Andrasi, Peng Zhou, Gaofei He, Danith H. Ly\*

*Department of Chemistry, Carnegie Mellon University, 4400 Fifth Ave.,  
Pittsburgh, Pennsylvania*

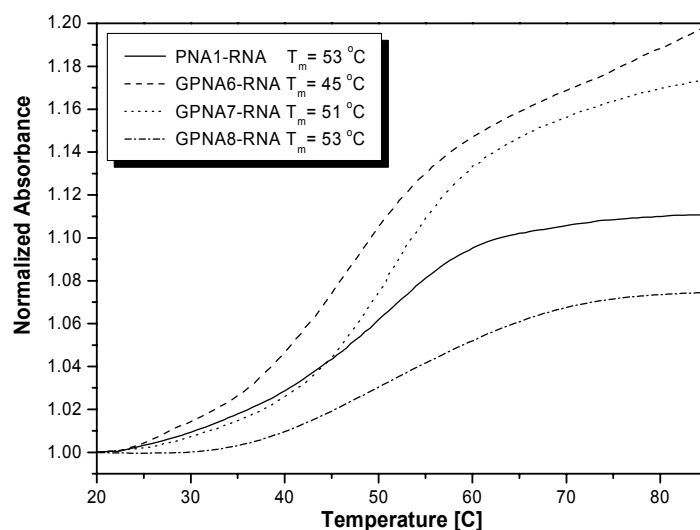

**Figure S1.** UV melting curves for PNA1-RNA and GPNA(6-8)-RNA duplexes. Thermal denaturation studies were performed on a Varian Cary 3 spectrophotometer equipped with thermoelectrically-controlled multicell holder, using 2  $\mu$ M complementary strands in 100mM NaCl, 10mM sodium phosphate, and 1mM EDTA, pH 7. All samples were annealed before using for melting experiments by heating up to 90 °C and slowly cooling down to room temperature. Thermal denaturation was monitored at 260 nm at a heating rate of 1 °C/min from 20 to 90 °C. The melting transitions were determined from the first derivatives of the UV-melting curves.

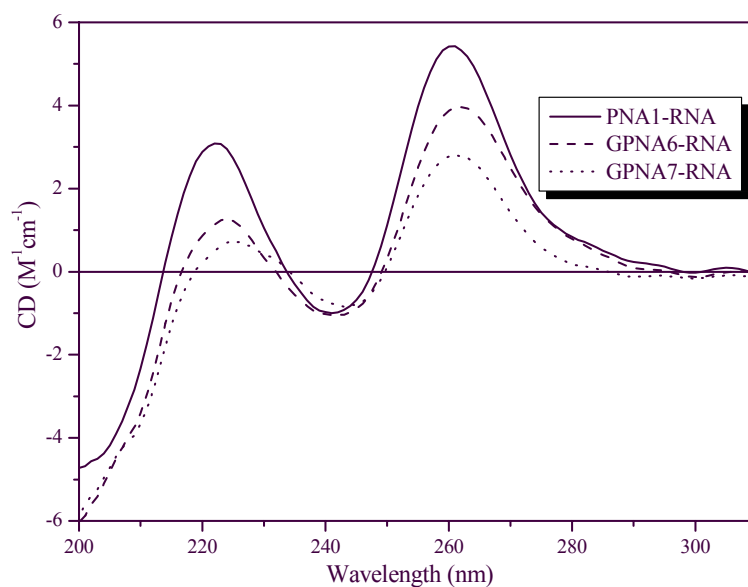

**Figure S2.** CD spectra of PNA1-RNA and GPNA(6-7)-RNA duplexes. CD experiments were performed on a Jasco J-715 spectropolarimeter using the same samples used for the melting experiments. Scans were run from 320 to 200 nm taking measurements every 1 nm. All spectra represent an average of at least 15 scans and were recorded at a rate of 100 nm/min. A 1-cm path-length cuvette was used, and the temperature was maintained at 22 °C.

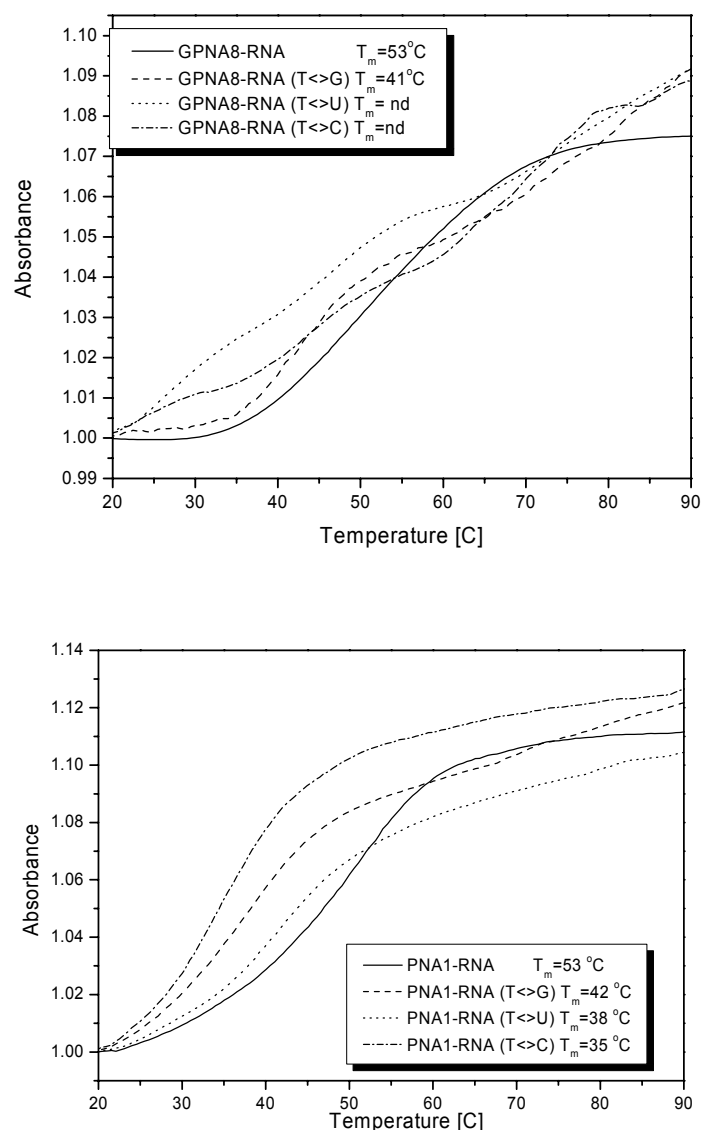

**Figure S3.** UV melting curves of GPNA8-RNA and PNA1-RNA duplexes for perfectly matched and mismatched sequences. Thermal denaturation studies were performed on a Varian Cary 3 spectrophotometer equipped with thermoelectrically-controlled multicell holder, using 2  $\mu$ M complementary strands in 100 mM NaCl, 10 mM sodium phosphate, and 1 mM EDTA, pH 7. All samples were annealed before using for melting experiments by heating up to 90 °C and slowly cooling down to room temperature. Thermal denaturation was monitored at 260 nm at a heating rate of 1 °C/min from 20 to 90 °C. The melting transitions were determined from the first derivatives of the UV-melting curves.

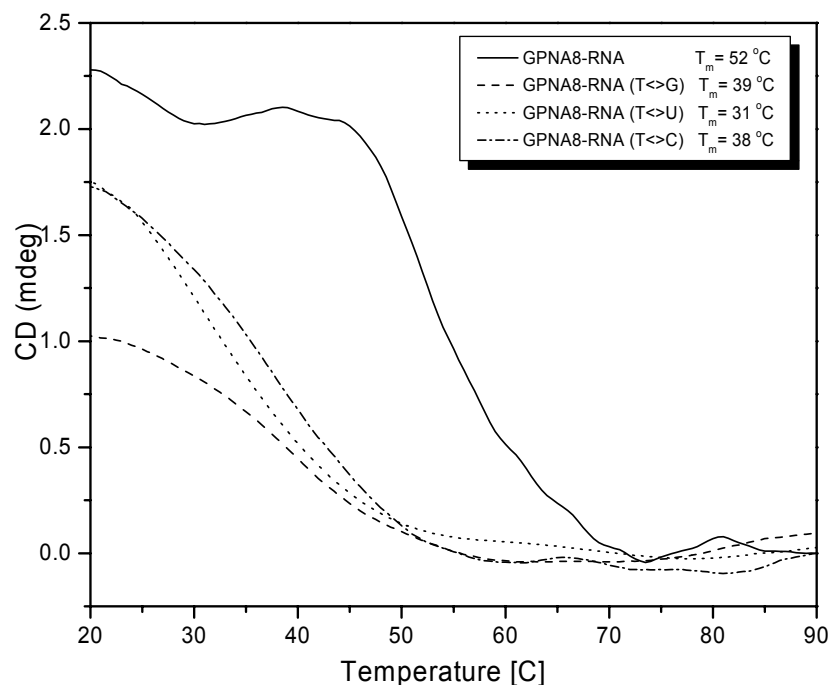

**Figure S4.** CD melting curves for GPNA8-RNA duplexes containing perfectly matched and mismatched sequences. The CD spectra were recorded at 260 nm as a function of temperature from 20 to 90°C. CD melting experiments were performed on a Jasco J-715 spectropolarimeter using 2  $\mu$ M complementary strands in 100 mM NaCl, 10mM sodium phosphate, and 1mM EDTA, pH 7. All samples were annealed before using for melting experiments by heating up to 90 °C and slowly cooling down to room temperature. The melting transitions were determined from the first derivatives of the UV-melting curves.

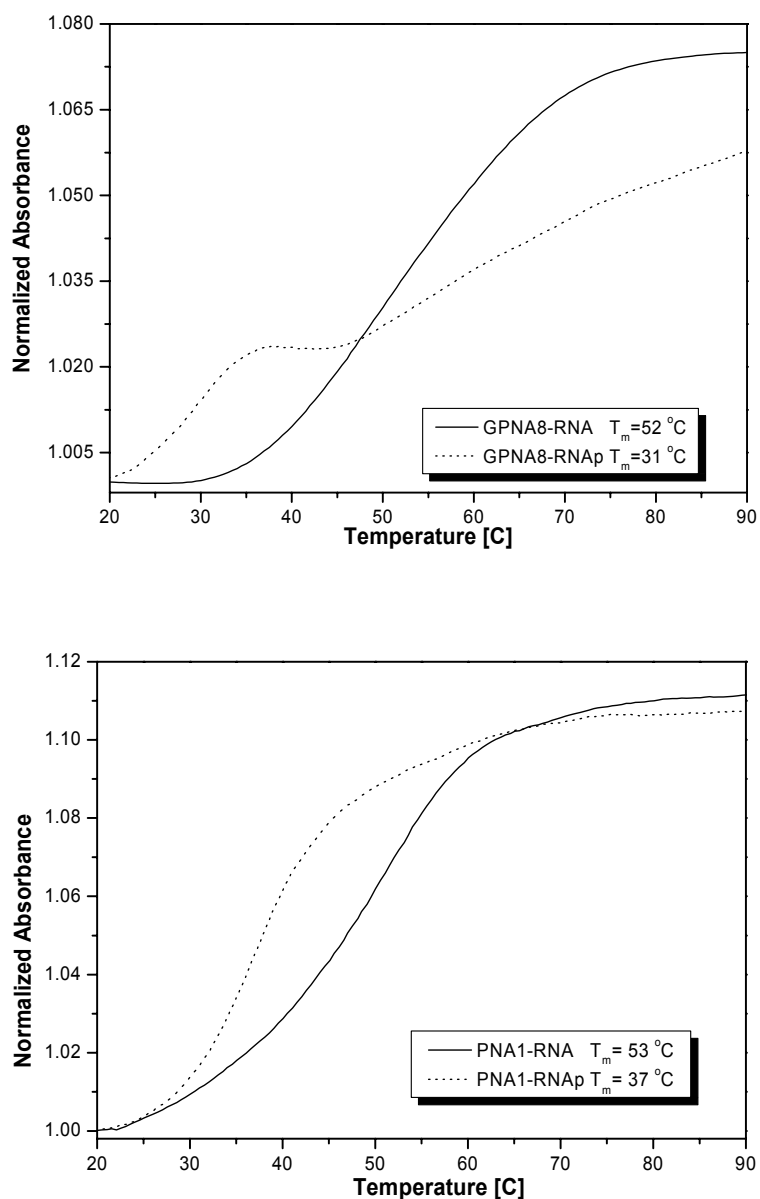

**Figure S5.** UV melting curves for antiparallel and parallel GPNA8-RNA and PNA1-RNA duplexes. Thermal denaturation studies were performed on a Varian Cary 3 spectrophotometer equipped with thermoelectrically-controlled multicell holder, using 2  $\mu\text{M}$  complementary strands in 100 mM NaCl, 10 mM sodium phosphate, and 1 mM EDTA, pH 7. All samples were annealed before using for melting experiments by heating up to 90  $^\circ\text{C}$  and slowly cooling down to room temperature. Thermal denaturation was monitored at 260 nm at a heating rate of 1  $^\circ\text{C}/\text{min}$  from 20 to 90  $^\circ\text{C}$ . The melting transitions were determined from the first derivatives of the UV-melting curves.

# Supplementary Material (ESI) for Chemical Communications  
 # This journal is © The Royal Society of Chemistry 2005

|                                    | <b>PNA1</b><br>H-GCATGTTTGA- <sup>L</sup> Lys-NH <sub>2</sub> | <b>GPNA8</b><br>H- H-G <sup>D</sup> CA <sup>D</sup> TG <sup>D</sup> TT <sup>D</sup> TG <sup>D</sup> A-NH <sub>2</sub> |
|------------------------------------|---------------------------------------------------------------|-----------------------------------------------------------------------------------------------------------------------|
| RNA<br>5'-UCA <u>A</u> ACAUGC-3'   | $T_m = 53\text{ }^\circ\text{C}$                              | $T_m = 52\text{ }^\circ\text{C}$                                                                                      |
| RNA-U<br>5'-UCA <u>U</u> ACAUGC-3' | $T_m = 38\text{ }^\circ\text{C}$                              | $T_m = 31\text{ }^\circ\text{C}$                                                                                      |
| RNA-C<br>5'-UCA <u>C</u> ACAUGC-3' | $T_m = 35\text{ }^\circ\text{C}$                              | $T_m = 38\text{ }^\circ\text{C}$                                                                                      |
| RNA-G<br>5'-UCA <u>G</u> ACAUGC-3' | $T_m = 42\text{ }^\circ\text{C}$                              | $T_m = 39\text{ }^\circ\text{C}$                                                                                      |
| RNAp<br>3'-UCA <u>G</u> ACAUGC-5'  | $T_m = 37\text{ }^\circ\text{C}$                              | $T_m = 31\text{ }^\circ\text{C}$                                                                                      |

**S6.** Tabulation of melting transitions between perfectly matched and mismatched antiparallel GPN8-RNA and PNA1-RNA, and perfectly matched parallel GPNA8-RNAp and PNA1-RNAp duplexes. The indicated  $T_m$ s were determined from the data shown in S3, S4, and S6.
